# Supplementary material
Source: publisher figshare collection journal article supplement (https://acs.figshare.com/ndownloader/files/26691444)
Supplement: Supplementary file 1 [file 26691444]

## Supporting information

### Evidence for the coexistence of polysulfide and conversion reactions in the lithium storage mechanism of MoS<sub>2</sub> anode material

Woosung Choi<sup>1</sup>, Yun Seok Choi<sup>2</sup>, Hyunwoo Kim<sup>1</sup>, Jaesang Yoon<sup>1,3</sup>, Yelim Kwon<sup>2</sup>, Taewhan Kim<sup>1</sup>, Ju-Hyun Ryu<sup>2</sup>, Ji Hye Lee<sup>2</sup>, Wontae Lee<sup>1,4</sup>, Joonsuk Huh<sup>2,5,6</sup>, Ji Man Kim<sup>2,\*</sup>, and Won-Sub Yoon<sup>1,\*</sup>

<sup>1</sup> Department of Energy Science, Sungkyunkwan University, Suwon 16419, South Korea

<sup>2</sup> Department of Chemistry, Sungkyunkwan University, Suwon 16419, South Korea

<sup>3</sup> The Institute of New Paradigm of Energy Science Convergence, Sungkyunkwan University, Suwon 16419, South Korea

<sup>4</sup> Center for Fostering Renewable Energy Integrated System Researcher, Suwon 16419, South Korea

<sup>5</sup> SKKU Advanced Institute of Nanotechnology (SAINT), Sungkyunkwan University, Suwon 16419, South Korea

<sup>6</sup> Institute of Quantum Biophysics, Sungkyunkwan University, Suwon 16419, South Korea

**Figure S1.** (a) SEM image and (b) EDS mapping spectrum of commercial MoS<sub>2</sub>.

**Figure S2.** Low-magnitude TEM images of a MoS<sub>2</sub> microsphere for (a,b) pristine, (d,e) fully discharged, and (g,h) fully charged MoS<sub>2</sub>. Corresponding ED patterns of the MoS<sub>2</sub> electrode in (c,f,i), respectively.

**Figure S3.** Voltage profile (left, gray line), and Mo valence vs. capacity (right, dark blue line) of MoS<sub>2</sub> electrode upon the first cycle. Mo valence was calculated via linear interpolation using the X-ray absorption edge point of bulk MoS<sub>2</sub>, and Mo metal foil as the reference.

**Figure S4.** Voltage profiles for MoS<sub>2</sub> and MoS<sub>2</sub>+25S composite during the first cycle at 100 mA g<sup>-1</sup> between 3.0 and 0.001 V (vs. Li/Li<sup>+</sup>). The highlighted region indicates that the additional part which is only related to the sulfur reaction.

**Figure S5.** Voltage profile (left, gray line), and Mo valence vs. capacity (right, dark blue line) of MoS<sub>2</sub> electrode upon the second cycle. Mo valence was calculated via linear interpolation using the X-ray absorption edge point of bulk MoS<sub>2</sub>, and Mo metal foil as the reference.

**Figure S6.** Depth profile XPS of MoS<sub>2</sub>, which was obtained before sputtering and after sputtering at 30 nm (5 nm per each level). (a) Mo<sub>3d</sub> XPS spectra of 1FC and 2D200, (b) S<sub>2p</sub> XPS spectra of 1FC and 2D200.

**Figure S7.** XPS spectra of MoS<sub>2</sub> after eliminating the SEI layer. (a) Mo<sub>3d</sub> at level 6 (30 nm) and (b) S<sub>2p</sub> at level 6 (30 nm).

**Figure S8.** k<sup>3</sup>-weighted Fourier transform magnitude and imaginary part along with the best-fit model of Mo K-edge EXAFS spectrum of pristine MoS<sub>2</sub>, 1<sup>st</sup> full charge, and 2<sup>nd</sup> discharge 400.

**Figure S9.** k-weight fitting of pristine MoS<sub>2</sub> EXAFS to determine the reduction factor (S<sub>0</sub><sup>2</sup>) and coordination number (CN).

**Figure S10.** (a) Voltage profiles of the MoS<sub>2</sub> during the 1<sup>st</sup> to 10<sup>th</sup> cycles between 0.001–3.0 V (vs. Li/Li<sup>+</sup>) at a current density of 100 mA g<sup>-1</sup>. (b) CV profiles between 0.001–3.0 V (vs. Li/Li<sup>+</sup>) at a scan rate of 0.05 mV s<sup>-1</sup> during the 1<sup>st</sup> to 10<sup>th</sup> cycles.

**Table S1.** Best-fit results for k<sup>3</sup>-weighted Mo K-edge EXAFS spectrum data.

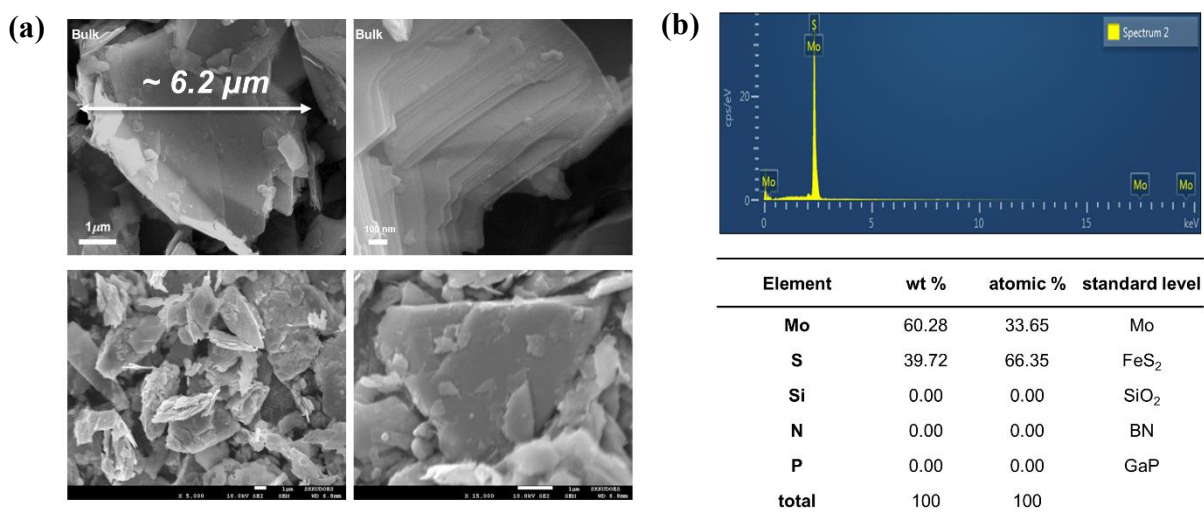

**Figure S1.** (a) SEM image and (b) EDS mapping spectrum of commercial MoS<sub>2</sub>.

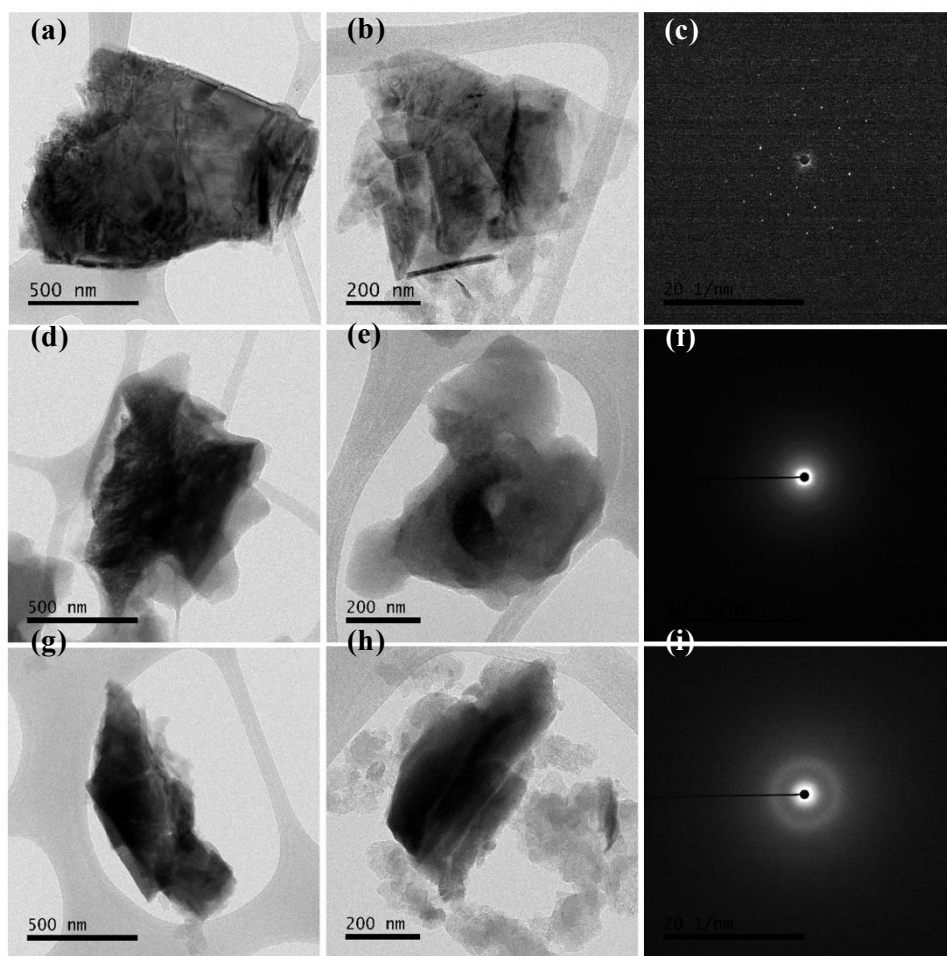

**Figure S2.** Low-magnitude TEM images of a MoS<sub>2</sub> microsphere for (a,b) pristine, (d,e) fully discharged, and (g,h) fully charged MoS<sub>2</sub>. Corresponding ED patterns of the MoS<sub>2</sub> electrode in (c,f,i), respectively.

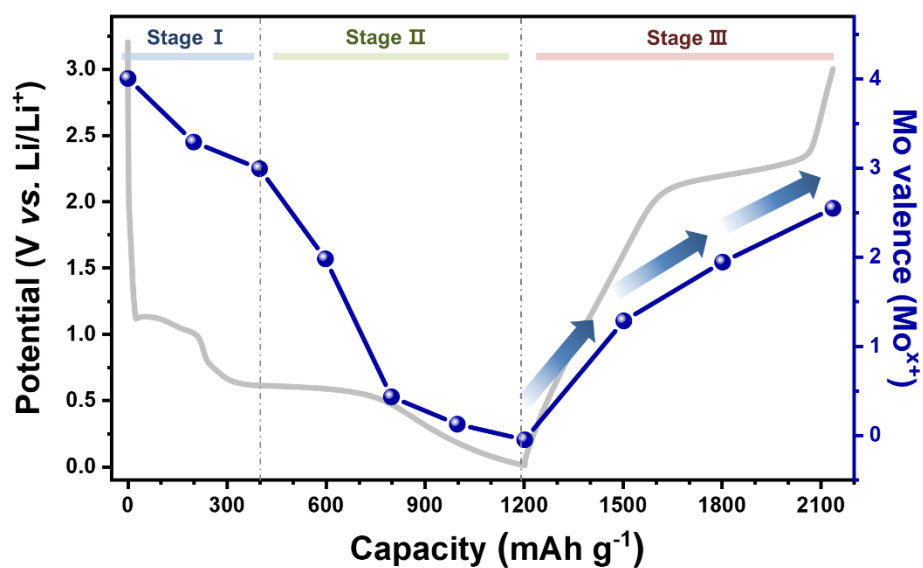

**Figure S3.** Voltage profile (left, gray line), and Mo valence vs. capacity (right, dark blue line) of MoS<sub>2</sub> electrode upon the first cycle. Mo valence was calculated via linear interpolation using the X-ray absorption edge point of bulk MoS<sub>2</sub>, and Mo metal foil as the reference.

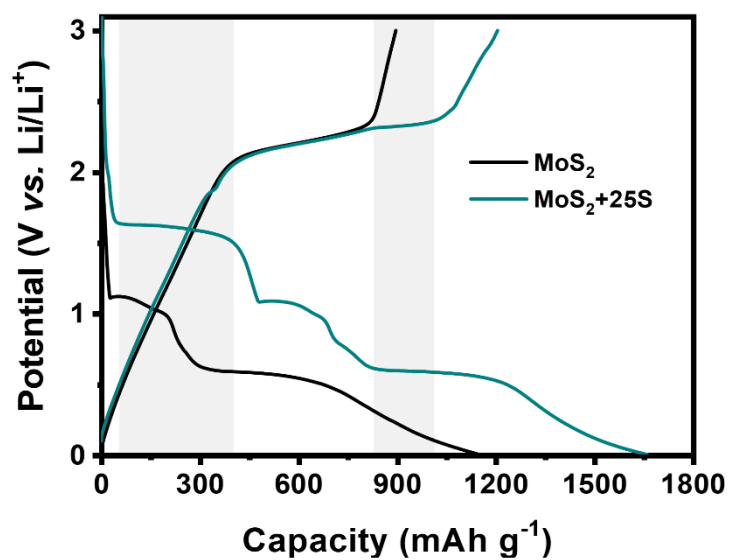

**Figure S4.** Voltage profiles for MoS<sub>2</sub> and MoS<sub>2</sub>+25S composite during the first cycle at 100 mA g<sup>-1</sup> between 3.0 and 0.001 V (vs. Li/Li<sup>+</sup>). The highlighted region indicates that the additional part which is only related to the sulfur reaction.

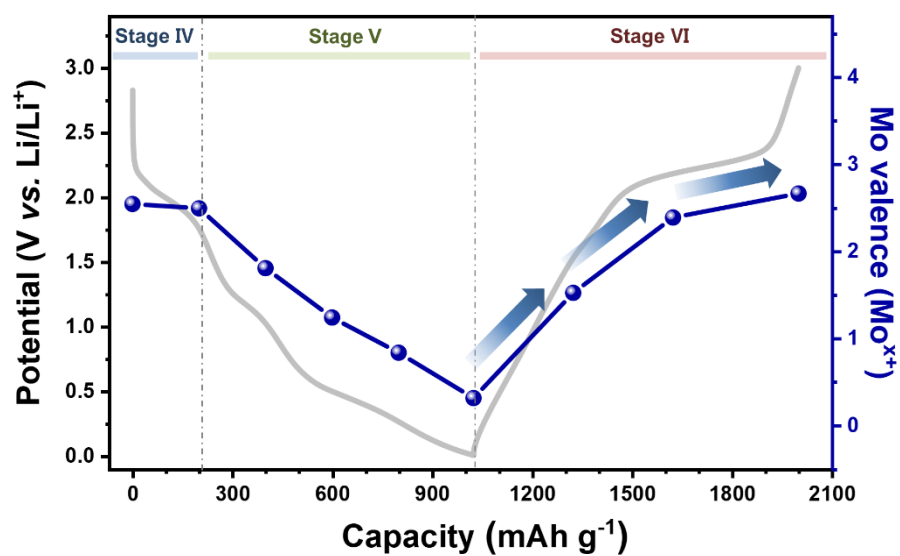

**Figure S5.** Voltage profile (left, gray line), and Mo valence vs. capacity (right, dark blue line) of MoS<sub>2</sub> electrode upon the second cycle. Mo valence was calculated via linear interpolation using the X-ray absorption edge point of bulk MoS<sub>2</sub>, and Mo metal foil as the reference.

(a) Depth profile of samples\_ **Mo<sub>3d</sub>**

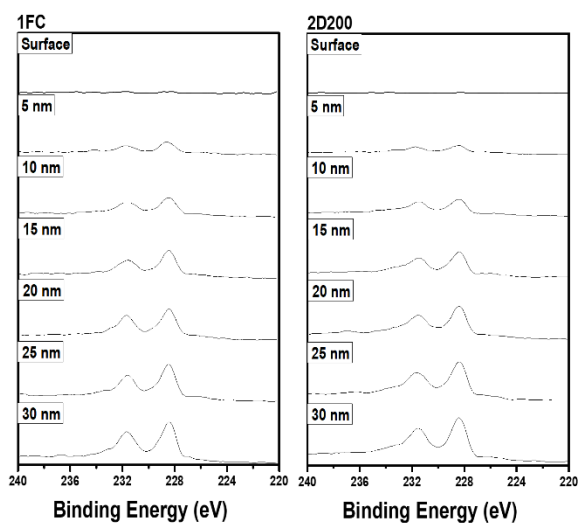

(b) Depth profile of samples\_ **S<sub>2p</sub>**

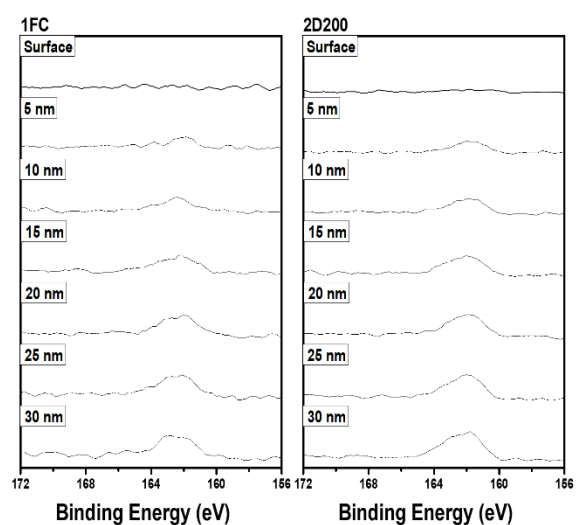

**Figure S6.** Depth profile XPS of MoS<sub>2</sub>, which was obtained before sputtering and after sputtering at 30 nm (5 nm per each level). (a) Mo<sub>3d</sub> XPS spectra of 1FC and 2D200, (b) S<sub>2p</sub> XPS spectra of 1FC and 2D200.



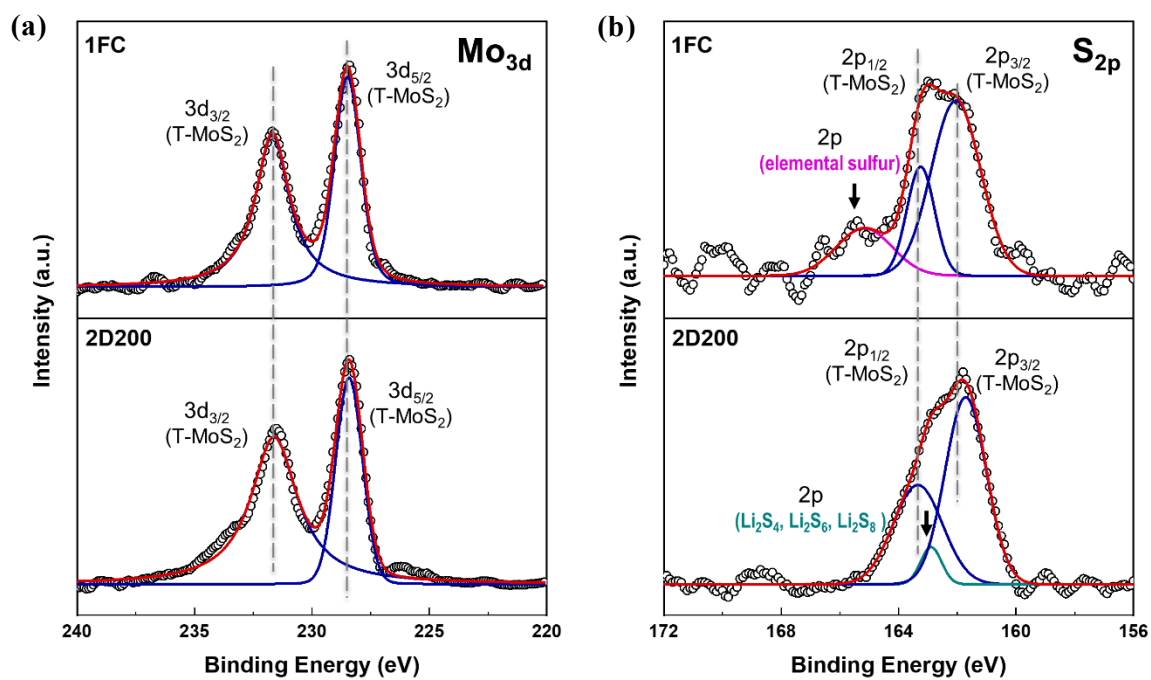

**Figure S7.** XPS spectra of MoS<sub>2</sub> after eliminating the SEI layer. (a) Mo<sub>3d</sub> at level 6 (30 nm) and (b) S<sub>2p</sub> at level 6 (30 nm).

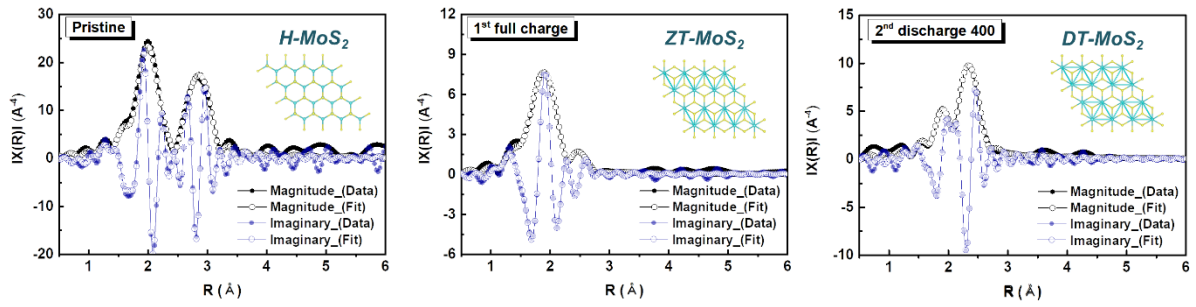

**Figure S8.**  $k^3$ -weighted Fourier transform magnitude and imaginary part along with the best-fit model of Mo K-edge EXAFS spectrum of pristine  $\text{MoS}_2$ , 1<sup>st</sup> full charge, and 2<sup>nd</sup> discharge 400.

**Table S1.** Best-fit results for  $k^3$ -weighted Mo K-edge EXAFS spectrum data.

| Sample                           | Path  | CN     | R [Å]     | $\sigma^2$ [ $10^{-3}\text{Å}^2$ ] | R-factor |
|----------------------------------|-------|--------|-----------|------------------------------------|----------|
| Pristine<br>(H- $\text{MoS}_2$ ) | Mo-S  | 6.0*   | 2.407(2)  | 2.27*                              | 0.00569  |
|                                  | Mo-Mo | 6.0*   | 3.171(3)  | 4.1(2)                             |          |
| 1FC<br>(ZT- $\text{MoS}_2$ )     | Mo-S  | 4.4(2) | 2.413(3)  | 8.0(5)                             | 0.00194  |
|                                  | Mo-Mo | 2.1(8) | 2.771(10) | 16.1(38)                           |          |
| 2D-400<br>(DT- $\text{MoS}_2$ )  | Mo-S  | 3.5(4) | 2.475(12) | 5.4(10)                            | 0.00209  |
|                                  | Mo-Mo | 3.0(4) | 2.652(6)  | 5.0(5)                             |          |

\* Fixed value

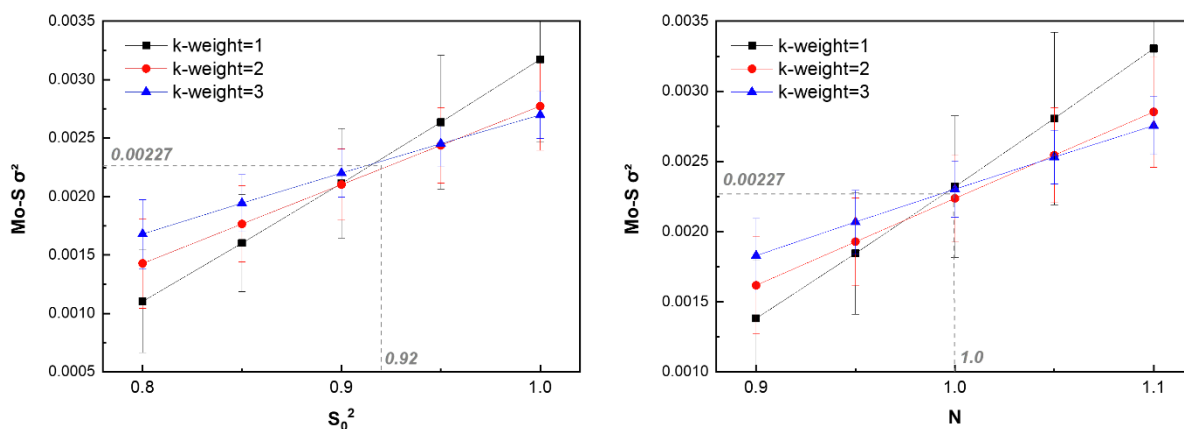

**Figure S9.** k-weight fitting of pristine MoS<sub>2</sub> EXAFS to determine the reduction factor ( $S_0^2$ ) and coordination number (CN).

To determine the reduction factor ( $S_0^2$ ) of MoS<sub>2</sub>, k-weight fitting was performed based on the pristine sample as shown in **Figure S9** and the  $S_0^2$  value was obtained as 0.92. EXAFS fitting with the  $S_0^2$  value fixed at 0.92 was performed for two other samples. Consequently, the pristine MoS<sub>2</sub> results were consistent with the H-MoS<sub>2</sub> (hexagonal symmetry) crystallography values.

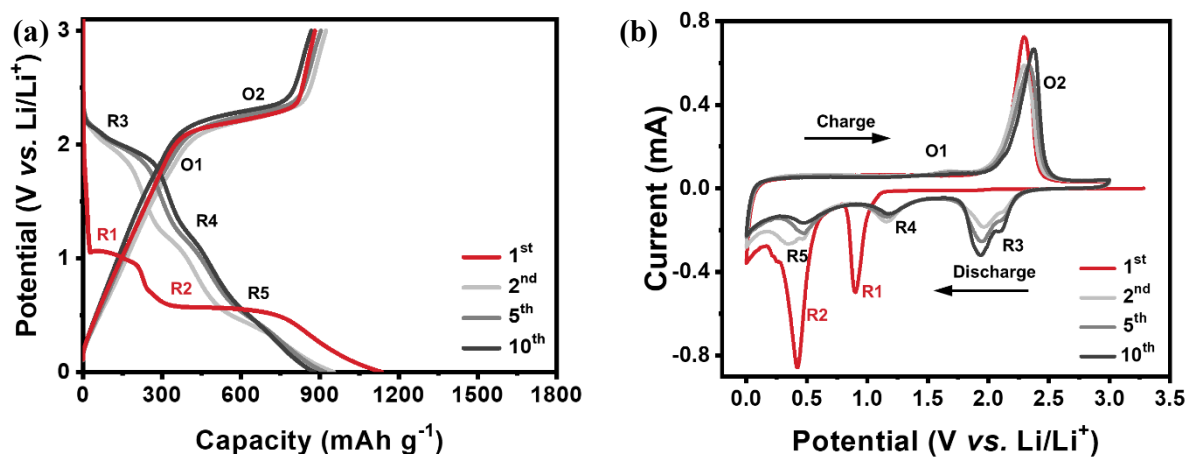

**Figure S10.** (a) Voltage profiles of the MoS<sub>2</sub> during the 1<sup>st</sup> to 10<sup>th</sup> cycles between 0.001–3.0 V (vs. Li/Li<sup>+</sup>) at a current density of 100 mA g<sup>-1</sup>. (b) CV profiles between 0.001–3.0 V (vs. Li/Li<sup>+</sup>) at a scan rate of 0.05 mV s<sup>-1</sup> during the 1<sup>st</sup> to 10<sup>th</sup> cycles.
